# Supplementary material for: Distinct roles of androgen receptor, estrogen receptor alpha, and BCL6 in the establishment of sex-biased DNA methylation in mouse liver
Source: PubMed Central journal article supplement (PMC8253761; doi:10.1038/s41598-021-93216-6), 2021-07-02
Supplement: 41598_2021_93216_MOESM1_ESM.pdf [file 41598_2021_93216_MOESM1_ESM.pdf]

**Table S1. Sex-biased differentially methylated regions (sDMRs) tested in our study and associated sex-biased differentially expressed genes (sDEGs) and non-biased proximal genes.**

| sDMR                                         | Bias in methylation | Gene              | Bias in expression | Fold difference [log <sub>2</sub> ] F/M | Adjusted p-value [dseq] |
|----------------------------------------------|---------------------|-------------------|--------------------|-----------------------------------------|-------------------------|
| <i>Cyp7b1</i> (intron)                       | F>M                 | <i>Cyp7b1</i>     | M>F                | -2.92 (-2.7)                            | 1.10E-13 (3.7E-12)      |
| <i>Gstp1</i> (distal enhancer, genic region) | F>M                 | <i>Gstp1</i>      | M>F                | -3.15 (-2.9)                            | 8.80E-11 (7.7E-10)      |
|                                              |                     | <i>Gstp2</i>      | M>F                | -1.25 (-1.3)                            | 0.075 (0.046)           |
| <i>Hsd3b5</i> (intron)                       | F>M                 | <i>Hsd3b5</i>     | M>F                | -5.06 (-2.9)                            | 1.40E-57 (1.7E-26)      |
|                                              |                     | <i>Gm12400</i>    | M>F                | -2.28 (-5.06)                           | 0.34 (0.028)            |
|                                              |                     | <i>Hsd3b3</i>     | M>F                | -0.49 (-0.42)                           | 0.044 (0.12)            |
|                                              |                     | <i>Hsd3b2</i>     | M>F                | -0.72 (-0.74)                           | 0.11 (0.082)            |
| <i>Comt</i> (distal enhancer)                | F>M                 | <i>Comt</i>       | M>F                | -0.86 (-0.71)                           | 1.50E-05 (5.0E-04)      |
| <i>Esr1</i> (intron)                         | F>M                 | <i>Esr1</i>       | F>M                | 0.75 (0.87)                             | 0.024 (0.0034)          |
| <i>Elovl3</i> (intron)                       | F>M                 | <i>Elovl3</i>     | M>F                | -5.07 (-5.28)                           | 4.7E-25 (1.0E-26)       |
| <i>Cux2</i> (intron)                         | M>F                 | <i>Cux2</i>       | F>M                | 5.26 (4.99)                             | 1.20E-18 (5.7E-202)     |
| <i>Cyp2b9</i> (exon-3'UTR)                   | M>F                 | <i>Cyp2b9</i>     | F>M                | 6.67(6.66)                              | 2.80E-181 (0)           |
|                                              |                     | <i>Cyp2b13</i>    | F>M                | 9.68 (9.4)                              | 6.8E-24 (1.2E-33)       |
|                                              |                     | <i>Cyp2b10</i>    | F>M                | 4.32 (3.8)                              | 2.30E-13 (3.60E-06)     |
|                                              |                     | <i>Cyp2a4</i>     | F>M                | 3.96 (4.2)                              | 8.00E-12 (1.60E-142)    |
|                                              |                     | <i>Gm8902</i>     | F>M                | 4.18 (3.8)                              | 9.20E-05 (0.0014)       |
|                                              |                     | <i>Rnfl70-ps</i>  | F>M                | 6.49 (6.34)                             | 1.0E-10 (4.80E-19)      |
|                                              |                     | <i>Vmn1r-ps86</i> | F>M                | 5.79 (4.53)                             | 9.50E-4 (0.42)          |
|                                              |                     | <i>Vmn1r184</i>   | F>M                | 4.24 (3.14)                             | 3.80E-05 (0.058)        |
| <i>Fmo3</i> (intron)                         | M>F                 | <i>Fmo3</i>       | F>M                | 8.82 (8.89)                             | 6.00E-99 (1.4E-22)      |
|                                              |                     | <i>Gm37273</i>    | F>M                | 6.73 (6.50)                             | 7.10E-24 (6.40E-17)     |
|                                              |                     | <i>Fmo2</i>       | F>M                | 1.67 (1.8)                              | 1.50E-21 (1.30E-11)     |
|                                              |                     | <i>Fmo1</i>       | F>M                | 0.86 (0.91)                             | 3.40E-06 (9.40E-09)     |
|                                              |                     | <i>Fmo6</i>       | F>M                | 1.2                                     | 0.9                     |
|                                              |                     | <i>Fmo4</i>       | F>M                | 0.6 (0.54)                              | 0.022 (0.014)           |
| <i>Aldh3b3</i> (CTCF site)                   | M>F                 | <i>Aldh3b3</i>    | F>M                | 5.17 (5.4)                              | 2.40E-36 (1.5E-24)      |
|                                              |                     | <i>Aldh3b2</i>    | F>M                | 3.99 (4.99)                             | 0.0012 (3.70E-09)       |

Data from WGBS and RNA-seq datasets<sup>6</sup> comparing XX.F to XY.M and XY.F to XY.M. The results from the comparison between XY.F and XY.M are shown in parentheses. Positive log<sub>2</sub> fold difference values show higher expression in females. Negative log<sub>2</sub> fold difference values show higher expression in males. Functional annotations for the sDMRs are based on ENCODE data.

**Table S2. List of genotyping primers**

| <b>Gene</b>         | <b>Forward primer</b>          | <b>Reverse primer</b>      |
|---------------------|--------------------------------|----------------------------|
| <i>Cre</i>          | AGGTGTAGAGAAGGCACTCAGC         | CTAATCGCCATCTTCCAGCAGG     |
| <i>Bcl6</i> -floxed | CCATTCTCAGAAGATTATGGCAGA       | CACACTATACATCAGAAAAGAATG   |
| <i>Esr1</i>         | ATCCCATGTGCTTGAGTGGT           | CCACTTCTCCTGGGAGTCTG       |
| <i>Sry</i>          | GCAGGCTGTAAAATGCCACT           | ATGCAGGTGGAAAAGCCTTA       |
| <i>Zfy</i>          | AAGATAAGCTTACATAATCACATGG<br>A | CCTATGAAATCCTTTGCTGCACATGT |

**Table S3. List of pyrosequencing methylation assay primers**

| Gene symbol    | Chr. | CG position (mm10) | Primer 1 (5'-3')                   | Primer 2 (5'-3')<br>biotinylated   | Sequencing primer (5'-3')    |
|----------------|------|--------------------|------------------------------------|------------------------------------|------------------------------|
| <i>Aldh3b3</i> | 19   | 3,955,095          | TTTTGGTGGTTGTAGATAGTGGT            | TAATTACCCCCCCCCCTACAAT             | GTAGATAGTGGTTGGTA            |
| <i>Comt</i>    | 16   | 18,407,984         | AAGGGGAAGGTGTTTTTAGTTG<br>ATAATG   | TTCTCCAAACCCTCCACCACTTTCAT<br>A    | GGTGTTTTTAGTTGATAATGT        |
| <i>Cux2</i>    | 5    | 121,999,270        | TAGGTATGGAATAGGATTTTAT<br>GTGTT    | ATAATAAATAACTCTCACCACCTTTA<br>CT   | ATGTGTTTTTAAAAGGTAA<br>AGAT  |
| <i>Cyp2b9</i>  | 7    | 26,210,279         | GGTAAGTTTTGTTGTTTTAAAGG<br>ATATTGA | ATAACACCTAACTCCCTCAC               | AAATATTTTTAGTATATTAGA<br>TT  |
| <i>Cyp7b1</i>  | 3    | 18,239,446         | GGTTATAAGGTTTGTGATATGTT<br>GTTA    | ATTCTTAACCAACTCTCTAAATATAC<br>AAT  | GGTTTGTGATATGTTGTTATA<br>G   |
| <i>Elovl3</i>  | 19   | 46,134,351         | GGTAGTGTTTTTGAGAGGTGA<br>GGGATTAT  | CCACACCCACACCCTAAAATTTCCAA<br>ATAT | AGGTGAGGGATTATAGT            |
| <i>Esr1</i>    | 10   | 4,729,743          | TTGGGGTTAATTATTTATTTGTG<br>AGT     | TCCCAAAAACACATTCCAAAAC             | TGAGTTATTGGGTTGG             |
| <i>Fmo3</i>    | 1    | 162,982,506        | GATAAAGGTATATTTGTTTATGG<br>ATATGT  | AATTACTCTCTAACCAACAATTA<br>AAAC    | ATTTATTTTTGTGAGGTTGAA        |
| <i>Gstp1</i>   | 19   | 4,034,872          | GTTTTGGTTGTTTTGGAATTTAT<br>TATGT   | AAATTTCTCTCCTTAACCTCAATATT<br>CT   | ATTTATTATGTAAATTAGGTT<br>GG  |
| <i>Hsd3b5</i>  | 3    | 98,626,053         | TTGTAGATATTGAATAGATATTA<br>GGGAATT | CTCCCCAACTTACTTCTTAATCATA          | ATTGAATAGATATTAGGGAA<br>TTTT |
| <i>Snrpn</i>   | 7    | 60,005,146         | TTGGTAGTTGTTTTTTGGTAGGA<br>T       | TCCACAAACCCAACTAACCTTC             | GTGTAGTTATTGTTTGGGA          |
| <i>Xist</i>    | X    | 103,481,082        | GTAATAGTTATGGGGTAGATTTT<br>GGA     | CTTAACCTCTAATTTAACCAACACTA<br>A    | ATTTAGTAGGTTTAGAGAAT         |

**Table S4. List of expression primers**

| <b>Gene</b>    | <b>Forward primer</b>   | <b>Reverse primer</b>    |
|----------------|-------------------------|--------------------------|
| <i>Aldh3b3</i> | ATGACCCTGTCCAGCCTTC     | ACGGAGGCCATTAAGCTTCT     |
| <i>Ar</i>      | AGAATCCCACATCCTGCTCA    | AAGTCCACGCTCACCATATG     |
| <i>Bcl6</i>    | CTTCCGGCACCTTCAGACT     | CAGTTGGCTTTTGTGACGAA     |
| <i>Comt</i>    | TTATCCCCCAGCTGAAGAAG    | ACATACGCCAGGAAGTCAGG     |
| <i>Cyp2b9</i>  | TGAGCACTTTCTAGATGCCAAT  | GGCAATGCTTTCACCAAGAC     |
| <i>Cyp2b13</i> | AGCTCTCCATGACCCACAGT    | GGAGGATGGACGTGAAGAAA     |
| <i>Cyp7b1</i>  | GCCCTCTTTCCTCCACTCAT    | CCTCCTTTGAAAAACGTGCT     |
| <i>Cux2</i>    | CCCCTCGGGTCAAAGTC       | GCTGCTCTCCTTCCAACCTCA    |
| <i>Elk4</i>    | CTGACTCCGAGCCCCTTG      | AGTGAACGGGCCATGACTG      |
| <i>Elovl3</i>  | TTCTCTTTCTTCTCAGCAAGGT  | GTGGTACCAGTGGACAAAGA     |
| <i>Esr1</i>    | CAGACACTTTGATCCACCTGA   | CGTTCTTGCATTTTCATGTTGTAG |
| <i>Esrra</i>   | GGCCACTCTCTGTGACCTTT    | CACTCTGCAGTACTGACATCTGG  |
| <i>Ets1</i>    | GGAATTCAAGCTTTCTGACCCA  | CCACGGCTCAGTTTCTCATA     |
| <i>Fmo2</i>    | TTGCCTTCGGAGACGACTAT    | TGCAGTATCTGACTCTGGCTTT   |
| <i>Fmo3</i>    | TGATGAGAAAATGGGGGAAA    | GCTTTGCACCAATGAAGGAG     |
| <i>Foxa1</i>   | ACTGTGAAGATGGAAGGGCA    | CCGGAGTTCATGTTGCTGAC     |
| <i>Foxa2</i>   | AGCCGTGAAGATGGAAGGG     | GGCGTTCATGTTGCTCACG      |
| <i>Foxa3</i>   | GCTCAGTGAAGATGGAGGCT    | ATGGTGGGCACAGGATTCA      |
| <i>Gabpa</i>   | AAGAACAAGCCTACCATGAAC T | ACACAAATCTCTTGCCTTGAAC T |
| <i>Ghr</i>     | TGAAGGGATGGATAATTCTGGAG | TCTCAATGAGTACACTGGACAG   |
| <i>H19</i>     | ACTACCTGCCTCAGGAATCTG   | TGGGTGGGTGCTATGAGTC      |
| <i>Hnf4a</i>   | GTTGCTAACACGATGCCCTC    | GCTGTGGAGTCTCGGGAG       |
| <i>Onecut1</i> | AGACCTTCCGGAGGATGTG     | TTCCCGTGTCTTGCTCTTT      |
| <i>Rpl19</i>   | GATCATCCGCAAGCCTGTGA    | GCATCCGAGCATTGGCAGTA     |
| <i>Sox6</i>    | GGATTGGGGAGTACAAGCAA    | CACCTGTTCTGTGGTGATG      |
| <i>Stat5b</i>  | CTCCTTCCCCAGTCGTGTG     | TCCAGATCGAAGTCCCCATC     |
| <i>Thrb</i>    | GCCGTCCTGCTAATGTCT      | TGGTGCTTCCGGTAATTGAT     |

### Cyp2 cluster

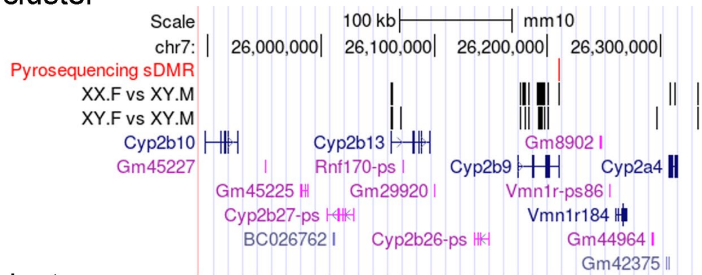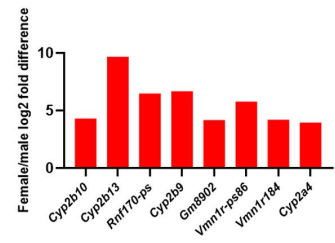

### Fmo cluster

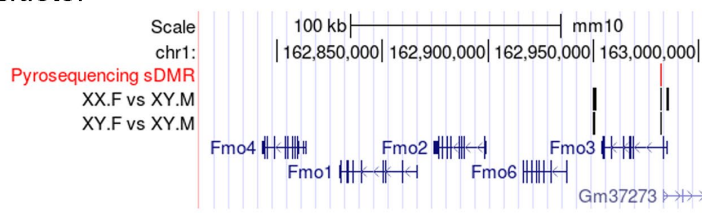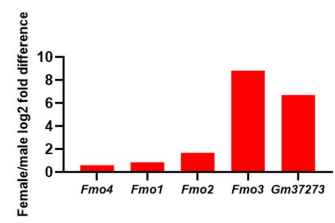

### Aldh3 cluster

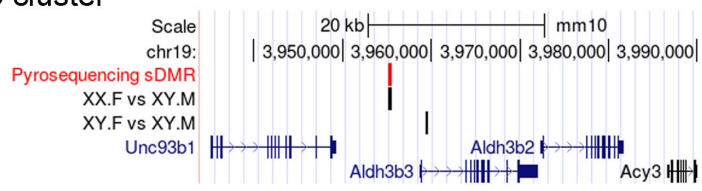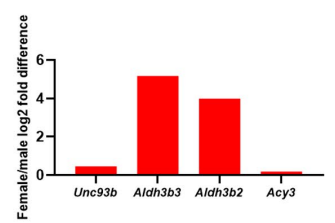

### Gstp cluster

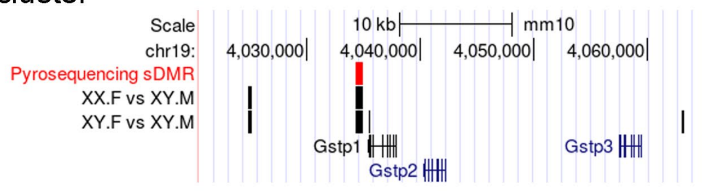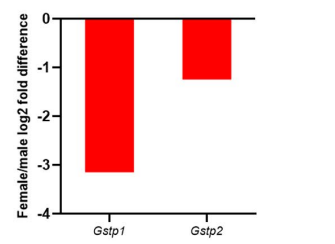

### Hsd3b cluster

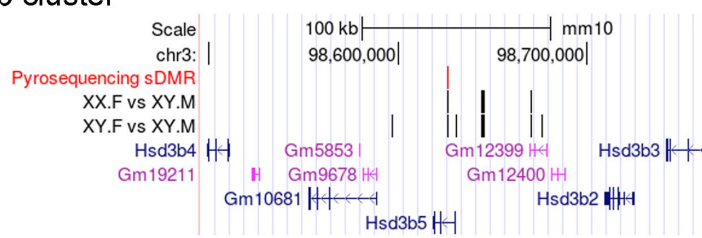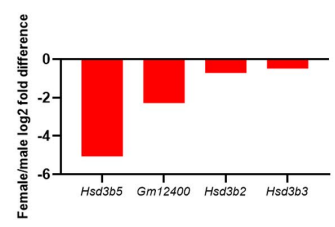

**Figure S1. SDMRs associated with sDEGs clusters.** All tracks are shown in the context of the UCSC genome browser (mm10). The ‘Pyrosequencing sDMR’ track shows the sDMR used for pyrosequencing methylation analysis. The ‘XX.F vs XY.M’ and ‘XY.F vs XY.M’ tracks show the locations of sDMRs based on WGBS data from <sup>6</sup>. On the right, log<sub>2</sub> fold difference in expression between XX.F and XY.M is shown, based on RNA-seq data from <sup>6</sup>. Positive values indicate higher expression in females.

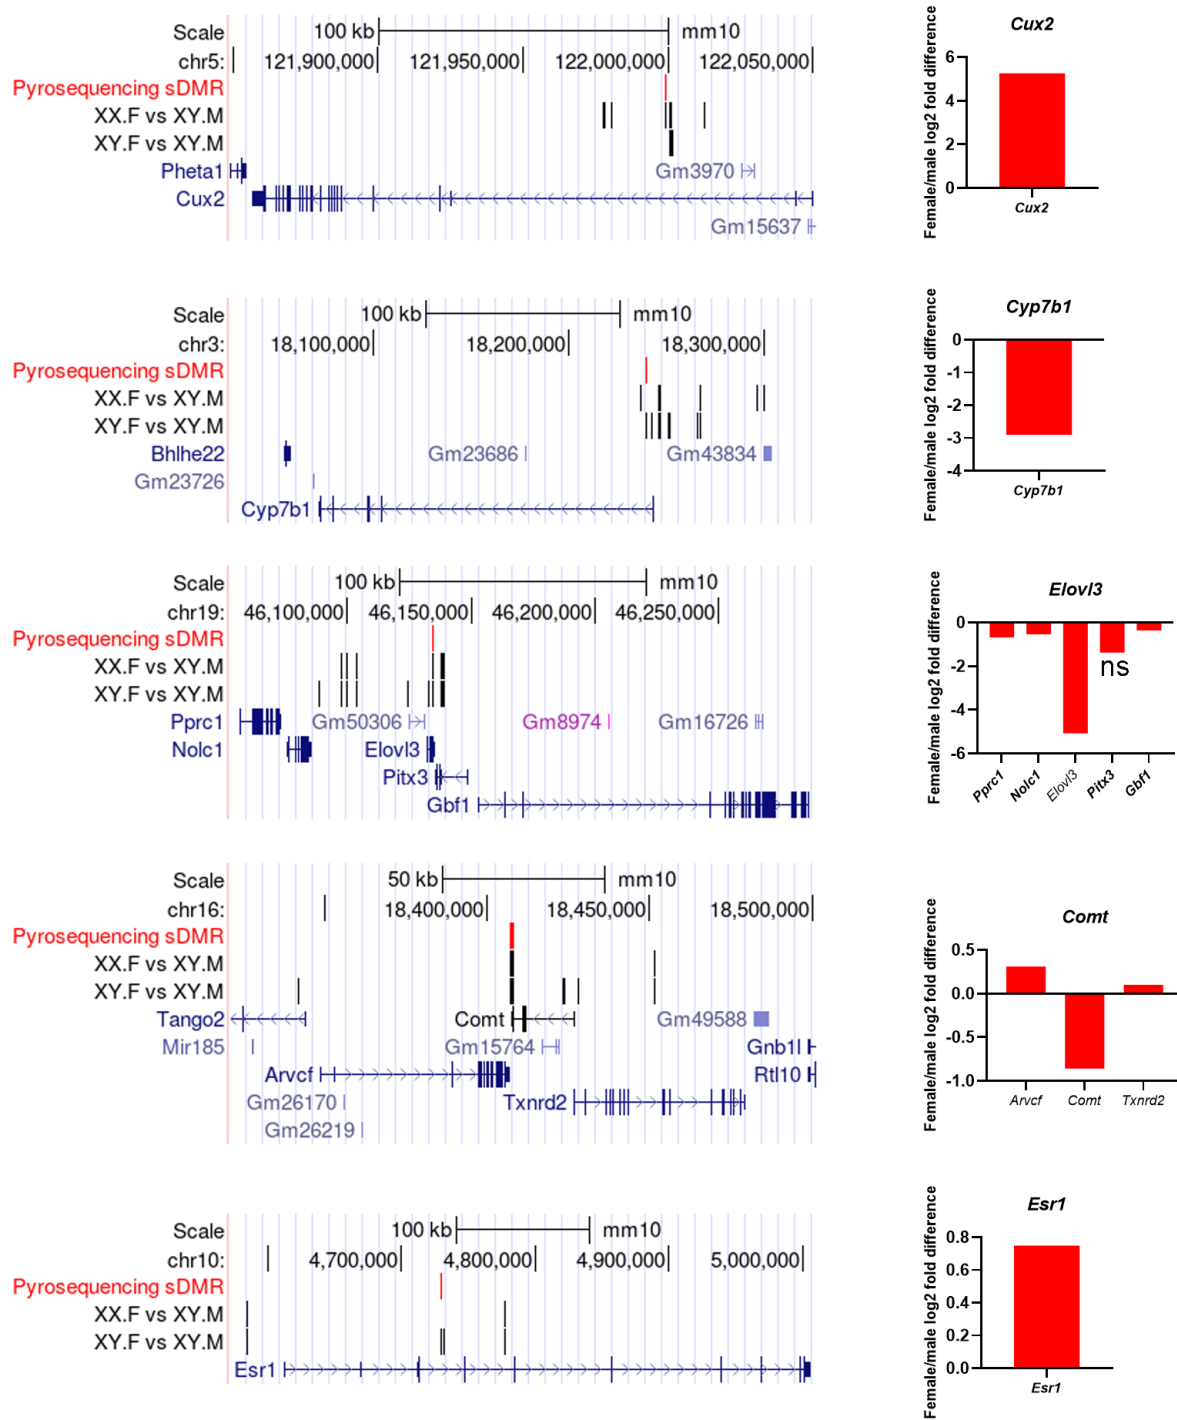

**Figure S2. SDMRs associated with a single sDEG.** All tracks are shown in the context of the UCSC genome browser (mm10). The ‘Pyrosequencing sDMR’ track shows the position of the sDMR tested in pyrosequencing methylation assays. The ‘XX.F vs XY.M’ and ‘XY.F vs XY.M’ tracks show the positions of sDMRs based on WGBS data from <sup>6</sup>. On the right, log<sub>2</sub> fold difference in expression between XX.F and XY.M, based on RNA-seq data from <sup>6</sup>. Positive values indicate higher expression in females.

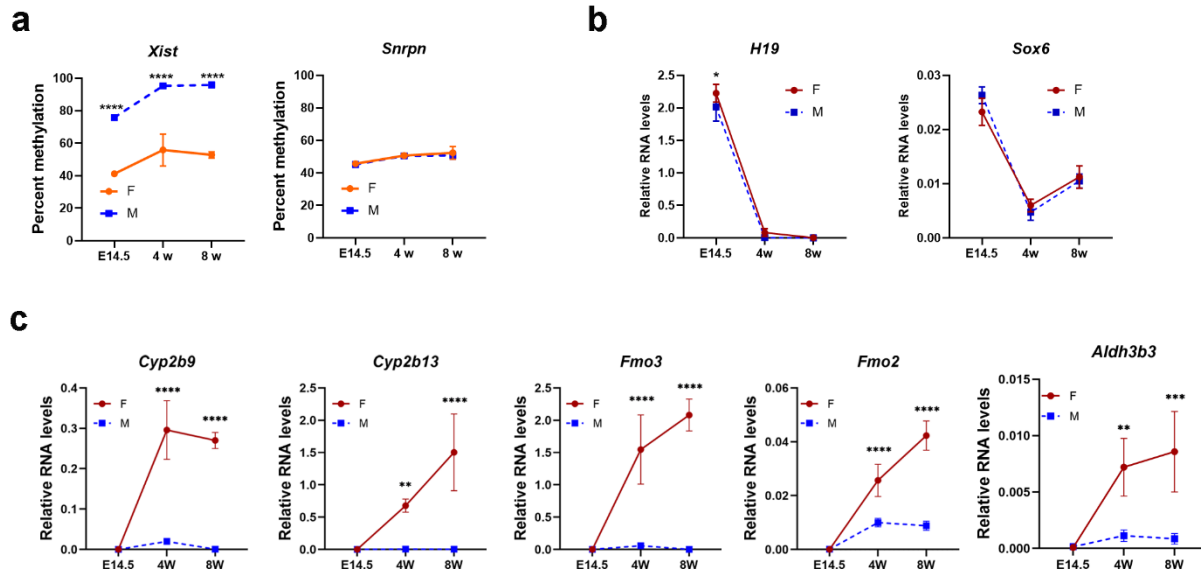

**Figure S3. Developmental dynamics of DNA methylation and gene expression.**

**a.** Methylation levels of *Xist* and *Snrpn* promoters at different ages. **b.** Developmental expression profiles of *H19* and *Sox6*. **c.** Developmental expression profiles of female-biased sDMRs-proximal sDEGs. All expression levels are normalized to *Rpl19*. Error bars show standard deviation. Statistically significant differences are shown with asterisks \*  $P < 0.05$ , \*\*  $P < 0.01$ , \*\*\*  $P < 0.001$ , \*\*\*\*  $P < 0.0001$  (two-way ANOVA followed by multiple testing with Sidak's correction).

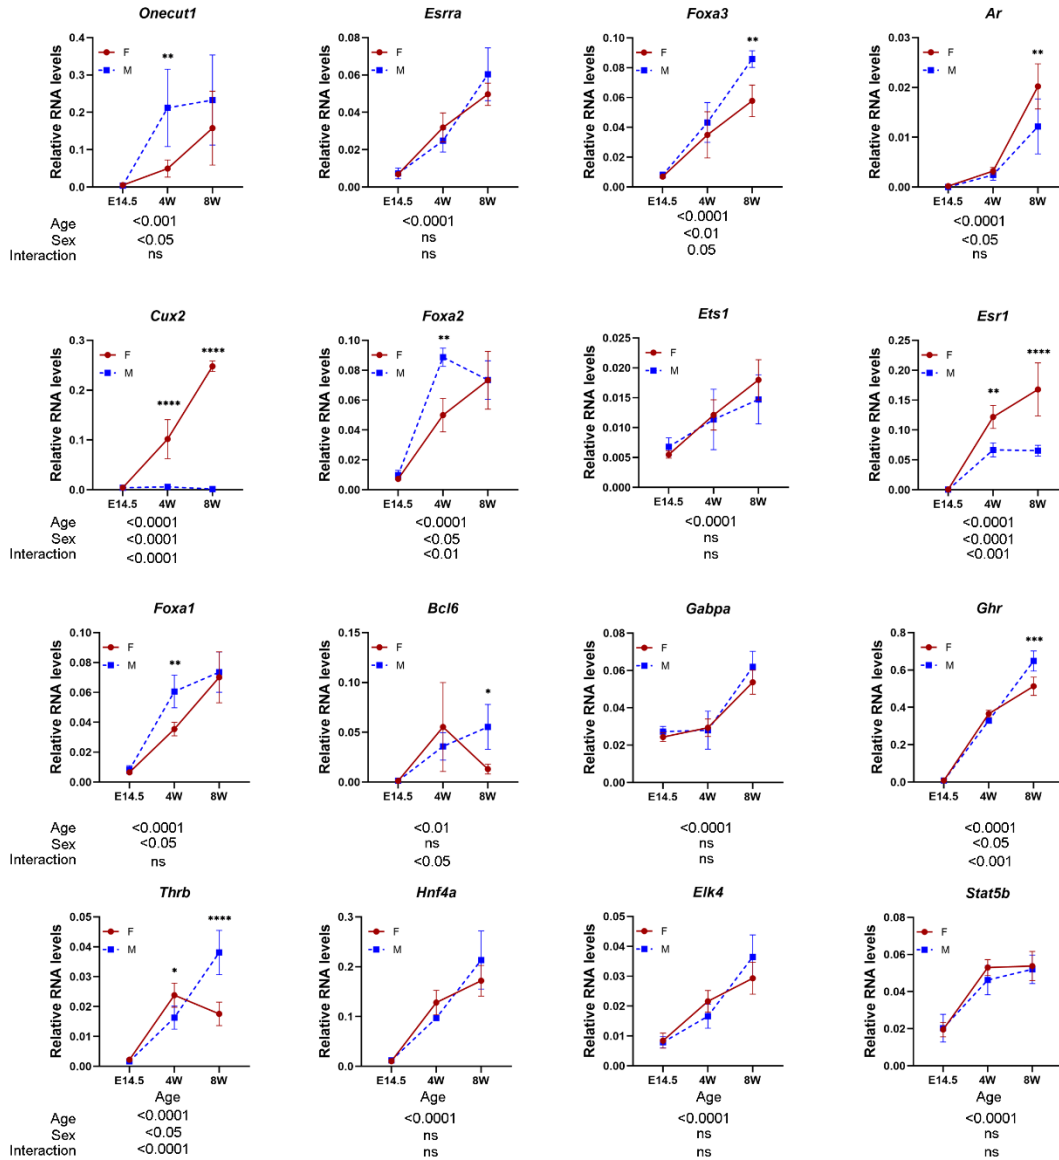

**Figure S4. Developmental expression profiles of genes encoding transcription factors.**

All expression levels are normalized to *Rpl19*. Results of two-way ANOVA testing of the impact of sex and age on expression shown below the diagrams. Error bars show standard deviation. Statistically significant differences are shown with asterisks \*  $P < 0.05$ , \*\*  $P < 0.01$ , \*\*\*  $P < 0.001$ , \*\*\*\*  $P < 0.0001$ , ns: non-significant (two-way ANOVA followed by multiple testing with Sidak's correction).



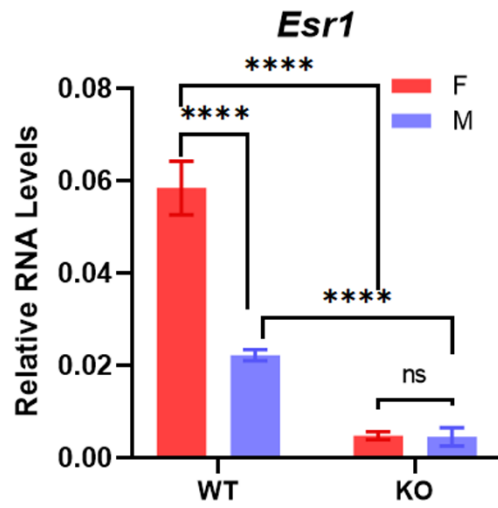

**Figure S5. Confirmation of low expression of *Esr1* in mutant ESR1KO mice.**

Expression levels are normalized to *Rpl19*. Error bars show standard deviation. Statistically significant differences are shown with asterisks \*\*\*\*  $P < 0.0001$ , ns: non-significant (two-way ANOVA followed by multiple testing with Sidak's correction).

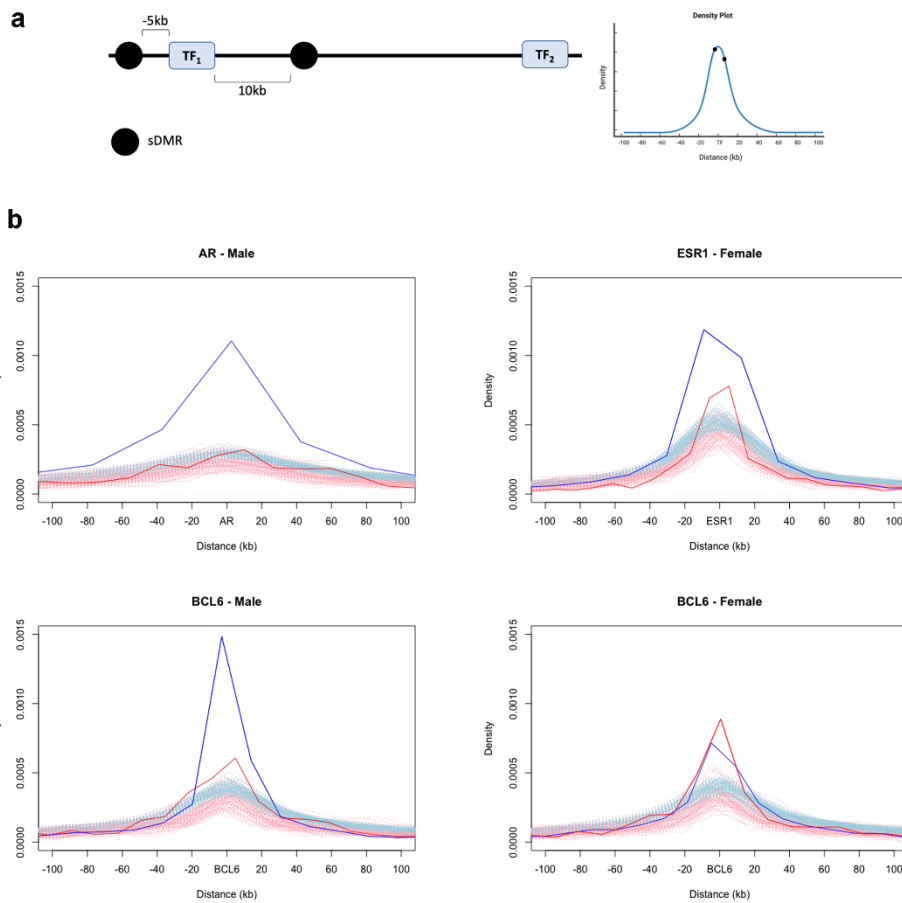

**Figure S6. Distribution of distances from the TF-binding site to the closest sDMR.**

**a.** Schematic shows how plots were generated. The distance between either end of the sDMR and the nearest ChIP-enriched regions was found, then a density plot was generated for each male-biased and female-biased sDMRs, relative to each AR-, ESR1-, or BCL6-enriched region in male or female liver. **b.** Density of sDMRs relative to AR ChIP peaks in male liver (left top panel); BCL6 ChIP peaks in male liver (left bottom panel); ESR1 ChIP peaks in female liver (right top panel), and BCL6 ChIP peaks in female liver (right bottom panel). The x-axis shows distance from the TF-enriched site, the y-axis shows density of sDMRs. Male-biased sDMRs – solid blue line, female-biased sDMRs - solid red line, dashed lines show 100 permutations for the male-biased (blue) or female-biased (red) sDMRs.
